# Supplementary material for: Surfactant-stabilized graphene/polyaniline nanofiber composites for high performance supercapacitor electrode
Source: Royal Society of Chemistry journal article supplement (doi:10.1039/c1jm12869h), 2011-10-12
Supplement: c1jm12869h.pdf [file c1jm12869h.pdf]

Electronic Supplementary Information for

**Surfactants-stabilized graphene/polyaniline nanofiber  
composites for high performance supercapacitor electrode**

Lu Mao, Kai Zhang, Hardy Sze On Chan\*, Jishan Wu\*

*Department of Chemistry, National University of Singapore, 3 Science Drive 3,*

*Singapore 117543. Fax: (65) 6779 1691.*

*E-mail: [chmcsoh@nus.edu.sg](mailto:chmcsoh@nus.edu.sg) (H.S.O. Chan), [chmwuj@nus.edu.sg](mailto:chmwuj@nus.edu.sg) (J. Wu).*

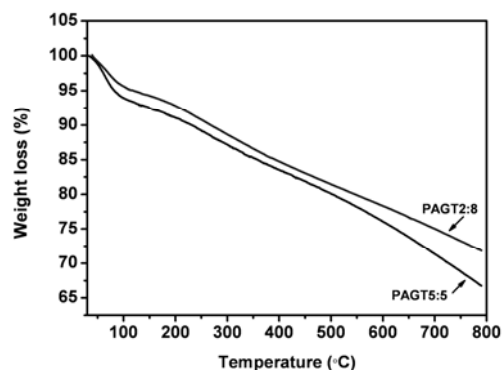

**Fig. S1.** TGA curves of PAGT2:8 and PAGT5:5 composites.

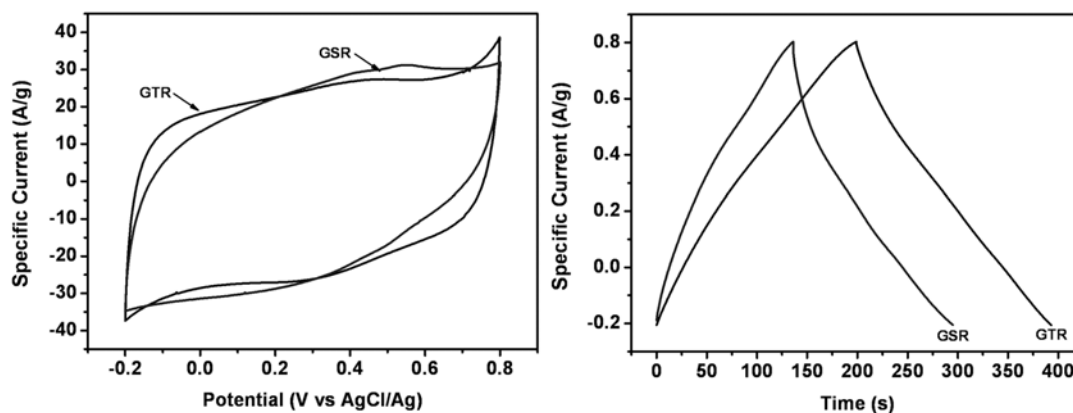

**Fig. S2.** Cyclic voltammograms and galvanostatic charge-discharge curves of GTR and GSR.

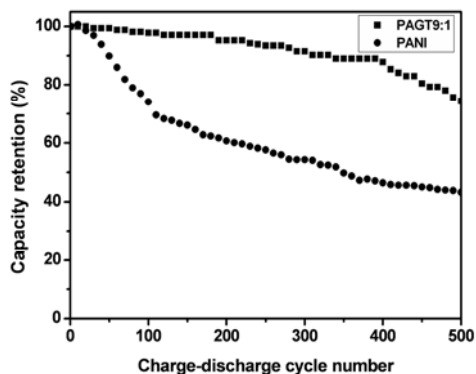

**Fig. S3.** Capacity retention of PAGT9:1 and PANI in 2 M H<sub>2</sub>SO<sub>4</sub> versus the number of charge/discharge cycles under current density of 2 A g<sup>-1</sup>.
